# Supplementary material for: Sweet and Sour Ehrlichia: Glycoproteomics and Phosphoproteomics Reveal New Players in Ehrlichia ruminantium Physiology and Pathogenesis
Source: Front Microbiol. 2019 Mar 15;10:450. doi: 10.3389/fmicb.2019.00450 (PMC6429767; doi:10.3389/fmicb.2019.00450)
Supplement: Supplementary file 6 [file Table_6.XLSX]

## Sheet: O-glycoproteins in 2D WB
Dataset S 6. ERGvir and ERGatt proteins identified by 2D Western blotting and MALDI-TOF/TOF . Spot numbers correspond to those indicated in Figure 6.
	Spot nb	Variant	T: UniProt names	T: Gene name	Protein name	Biological process	Cell component	found in total proteome	found in TPG glyco fraction	Protein pI (theoretical value)	Protein MW (kDa) (theoretical avlue)	Total ion score	Nb Peptides	Coverage (%)
	10	ERGvir	Q5FFG6	clpX	ATP-dependent Clp protease ATP-binding subunit ClpX	Stress response; Host-virus interaction	Cytosol	yes	yes	5.57	44.731	402	5	17
	11	ERGvir	Q5FFG6	clpX	ATP-dependent Clp protease ATP-binding subunit ClpX	Stress response; Host-virus interaction	Cytosol	yes	yes	5.57	44.731	749	8	27
	30	ERGatt	Q5FFG6	clpX	ATP-dependent Clp protease ATP-binding subunit ClpX	Stress response; Host-virus interaction	Cytosol	yes	yes	5.57	44.731	400	6	20
	29	ERGatt	Q5FF48	def	Peptide deformylase	Protein biosynthesis	Cytosol	yes	yes	6.33	20.816	172	5	19
	14	ERGvir	Q5FFM4	dnaK	Chaperone protein DnaK	Stress response, DNA replication	Cytosol/membrane	yes	no	5.17	69.957	1059	12	20
	31	ERGatt	Q5FFM4	dnaK	Chaperone protein DnaK	Stress response, DNA replication	Cytosol/membrane	yes	no	5.17	69.957	1059	12	20
	9	ERGvir	Q5FH08	ERGA_CDS_05140	ERGA_CDS_05140	Uncharacterized protein	Membrane associated protein	yes	yes	8.36	54.065	293	5	11
	26	ERGatt	Q5FGB7	ERGA_CDS_07920	Uncharacterized protein	ATP synthesis, Hydrogen ion transport, Ion transport, Transport	Membrane	yes	yes	5.54	48478	350	8	20
	16	ERGvir	Q5FGI8	ERGA_CDS_08670	Putative outer membrane protein	Membrane associated protein	Membrane	yes	no	6.01	20.913	513	6	32
	17	ERGvir	Q5FGI8	ERGA_CDS_08670	Putative outer membrane protein	Membrane associated protein	Membrane	yes	no	6.01	20.913	589	5	35
	33	ERGatt	Q5FGI8	ERGA_CDS_08670	Putative outer membrane protein	Membrane associated protein	Membrane	yes	no	6.01	20.913	513	6	32
	34	ERGatt	Q5FGI8	ERGA_CDS_08670	Putative outer membrane protein	Membrane associated protein	Membrane	yes	no	6.01	20.913	589	5	35
	20	ERGatt	Q5FGQ1	ftsZ	Cell division protein FtsZ	Cell cycle, Cell division	Cytosol	yes	yes	5.38	46097	550	12	20
	21	ERGatt	Q5FGQ1	ftsZ	Cell division protein FtsZ	Cell cycle, Cell division	Cytosol	yes	yes	5.38	46097	200	5	15
	12	ERGvir	Q5FFZ1	groEL	60 kDa chaperonin	Stress response	Cytosol	yes	no	5.44	58822	549	10	13
	18	ERGatt	Q5FFZ1	groEL	60 kDa chaperonin	Stress response	Cytosol	yes	yes	5.44	58822	1000	11	25
	2	ERGvir	Q9AF98_EHRRU	map 1	Major antigenic protein 1	Membrane-associated protein	Membrane	yes	yes	5.37	29.34	260	2	12
	3	ERGvir	Q9AF98_EHRRU	map 1	Major antigenic protein 1	Membrane-associated protein	Membrane	yes	yes	5.37	29.34	212	3	17
	4	ERGvir	Q9AF98_EHRRU	map 1	Major antigenic protein 1	Membrane-associated protein	Membrane	yes	yes	5.37	29.34	508	8	13
	5	ERGvir	Q9AF98_EHRRU	map 1	Major antigenic protein 1	Membrane-associated protein	Membrane	yes	yes	5.37	29.34	839	8	31
	22	ERGatt	Q9AF98_EHRRU	map 1	Major antigenic protein 1	Membrane-associated protein	Membrane	yes	yes	5.37	29.34	700	6	50
	23	ERGatt	Q9AF98_EHRRU	map 1	Major antigenic protein 1	Membrane-associated protein	Membrane	yes	yes	5.37	29.34	720	8	30
	24	ERGatt	Q9AF98_EHRRU	map 1	Major antigenic protein 1	Membrane-associated protein	Membrane	yes	yes	5.37	29.34	300	5	16
	25	ERGatt	Q9AF98_EHRRU	map 1	Major antigenic protein 1	Membrane-associated protein	Membrane	yes	yes	5.37	29.34	310	4	30
	13	ERGvir	Q5FGL4	map1-1	map1-1	Membrane-associated protein	Membrane	yes	yes	6.84	33.926	55	3	9
	19	ERGatt	Q5FGX2	nusA	Transcription termination/antitermination protein NusA	Transcription, Transcription antitermination, Transcription regulation, Transcription termination	Cytosol	yes	yes	4.82	57543	300	10	16
	15	ERGvir	Q5FFE0	rplL	50S ribosomal protein L7/L12	Translation	Ribosome	yes	no	5.1	14.797	886	10	45
	32	ERGatt	Q5FFE0	rplL	50S ribosomal protein L7/L12	Translation	Ribosome	yes	no	5.1	14.797	886	10	45
	28	ERGatt	Q5FFA2	rplY	50S ribosomal protein L25	Translation	Ribosome	yes	yes	6.36	23.004	250	4	30
	6	ERGvir	Q5FGA4	trbG/virB9	Probable conjugal transfer protein trbG	Bacterial secretion system	Membrane	yes	yes	8.88	29.512	103	2	6
	7	ERGvir	Q5FGA4	trbG/virB9	Probable conjugal transfer protein trbG	Bacterial secretion system	Membrane	yes	yes	8.88	29.512	110	3	10
	1	ERGvir	Q5FFE6	tuf1	Elongation factor Tu	Protein biosynthesis	Cytosol	yes	yes	5.25	43.282	507	7	20
	27	ERGatt	Q5FFE6	tuf1	Elongation factor Tu	Protein biosynthesis	Cytosol	yes	yes	5.25	43.282	96	1	11
	8	ERGvir	Q5FF32	virB11	VirB11 protein	Bacterial secretion system	Membrane	yes	yes	6.62	36.86	868	16	27
